# Supplementary material for: Emergence of phylogenetically diverse and fluoroquinolone resistant Salmonella Enteritidis as a cause of invasive nontyphoidal Salmonella disease in Ghana
Source: PLoS Negl Trop Dis. 2019 Jun 20;13(6):e0007485. doi: 10.1371/journal.pntd.0007485 (PMC6605661; doi:10.1371/journal.pntd.0007485)
Supplement: S1 Table — (XLSX) [file pntd.0007485.s001.xlsx]

## Sheet: Table 1
S1 Table. Individual isolate metadata and antimicrobial resistance determinant profiles.																											ANTIMICROBIAL RESISTANCE DETERMINANTS
SAMPLE ID	DATE OF BLOOD CULTURE	YEAR OF ISOLATION	COMPARTMENT	PATIENT AGE IN YEARS	DIARRHOEA REPORTED	POULTRY SOURCE	RUN ACCESSION	MULTI-LOCUS SEQUENCE TYPE (MLST)	ENTERITIDIS EBURST GROUP	CLADE	SINGLE NUCLEOTIDE POLYMORPHISM (SNP) ADDRESS*	CIPROFLOXACIN ETEST MINIMUM INHIBITORY CONCENTRATION μg/mL	CIPROFLOXACIN SUSCEPTIBILITY **	PUTATIVE DCS MECHANISM	ANTIBIOTIC SENSITIVITIES BY DISC DIFFUSION (PERFORMED IN GHANA LAB)									NUMBER OF RESISTANCE GENES	MULTI-DRUG RESISTANCE (MDR) ***	PLASMID REPLICATION ORIGINS (REP_T)	chl	flu_c	rif	tet	amn_c	mup	sul	b_lac	carb	mls_c	otr	trm	fus	fos	gly_c
															AMPICILLIN	AMOX/CLAV	CEFUROXIME	CEFTRIAXONE	CO-TRIMOXAZOLE	CIPROFLOXACIN	CHLORAMPHENICOL	TETRACYCLINE	GENTAMYCIN
1	2007-12-23	2007	Blood	3	no	na	ERR1010174	11	4	Global epidemic	1.1.173.302.302.3618.6971	0.12	DCS	gyrA_SET[87:D-G]	R	S	R	S	S	S	S	S	S	1	No	FII-S1;FIB-22	-	gyrA_SET[87:D-G]	-	-	-	-	-	-	-	-	-	-	-	-	-
2	2008-01-07	2008	Blood	0	missing data	na	ERR1010141	11	4	Global epidemic	1.1.2.1870.2871.3629.6982	0.12	DCS	gyrA_SET[87:D-N]	R	S	R	S	R	S	R	R	S	12	Yes	FIB-22;FII-S1;HI1[v]	catA-1	gyrA_SET[87:D-N]	-	tet(A)	aph(6)-Id,strA,strB	-	sul-2;sul-1	TEM-123	-	-	-	dfrA-1	-	-	-
3	2008-07-14	2008	Blood	1	yes	na	ERR984919	183	4	Extreme outlier	61.109.535.2053.2867.3625.6978	0.03	S	na	S	S	S	S	S	S	S	S	S	0	No	FII-S3	-	-	-	-	-	-	-	-	-	-	-	-	-	-	-
4	2008-11-21	2008	Blood	3	missing data	na	ERR1010128	11	4	Global epidemic	1.1.2.2054.2868.3626.6979	0.015	S	na	S	S	S	S	S	S	S	S	S	0	No	FII-S1;FIB-22	-	-	-	-	-	-	-	-	-	-	-	-	-	-	-
5	2008-11-30	2008	Blood	2	no	na	ERR984884	11	4	Global epidemic	1.1.147.2059.2875.3636.6989	0.015	S	na	S	S	S	S	S	S	S	R	R	5	Yes	FII-S1;FIB-22	-	-	-	tet(A)	aph(6)-Id,strA,strB	-	sul-2	-	-	-	-	-	-	-	-
6	2010-02-24	2010	Blood	22	yes	na	ERR984800	2107	4	Extreme outlier	68.134.701.2503.3503.4614.9680	0.03	S	na	S	S	S	S	S	S	S	S	S	0	No	FII-S3	-	-	-	-	-	-	-	-	-	-	-	-	-	-	-
7	2010-04-15	2010	Blood	2	no	na	ERR1010059	11	4	Global epidemic	1.1.2.2051.2862.3620.6973	0.25	DCS	gyrA_SET[87:D-N]	S	S	R	S	R	S	R	R	S	9	Yes	FII-S1;FIB-22	catA-1	gyrA_SET[87:D-N]	-	tet(A)	aph(6)-Id,strA,strB	-	sul-2;sul-1	-	-	-	-	dfrA-1	-	-	-
8	2010-09-06	2010	Blood	18	no	na	ERR984775	11	4	Global epidemic	1.1.538.2060.2876.3637.6990	0.12	DCS	gyrA_SET[87:D-G]	S	S	R	S	S	S	S	S	R	1	No	FII-S1;FIB-22	-	gyrA_SET[87:D-G]	-	-	-	-	-	-	-	-	-	-	-	-	-
9	2010-10-27	2010	Blood	1	no	na	ERR1010064	11	4	Global epidemic	1.1.173.302.302.3631.6986	0.12	DCS	gyrA_SET[87:D-G]	S	S	R	S	S	S	S	R	R	6	Yes	FII-S1;FIB-22	-	gyrA_SET[87:D-G]	-	tet(A)	aph(6)-Id,strA,strB	-	sul-2	-	-	-	-	-	-	-	-
10	2010-10-29	2010	Blood	0	no	na	ERR1010032	11	4	North American lineage	1.5.11.13.2864.3622.6975	0.03	S	na	S	S	R	S	S	S	S	S	R	0	No	FII-S1;FIB-22	-	-	-	-	-	-	-	-	-	-	-	-	-	-	-
11	2010-11-15	2010	Blood	3	no	na	ERR1010129	11	4	West african	9.16.68.2056.2870.3628.6981	0.03	S	na	R	R	S	S	S	S	S	S	R	5	Yes	I1	-	-	-	-	aph(6)-Id,strA,strB;	-	sul-2	TEM-1	-	-	-	-	-	-	-
12	2010-11-17	2010	Blood	2	no	na	ERR1010027	11	4	West african	9.16.68.2056.2870.3628.6988	0.03	S	na	R	S	S	S	S	S	S	S	R	5	Yes	I1	-	-	-	-	aph(6)-Id,strA,strB;	-	sul-2	TEM-1	-	-	-	-	-	-	-
13	2010-11-23	2010	Blood	2	no	na	ERR1010082	11	4	Global epidemic	1.1.538.2060.2876.3638.6991	0.25	DCS	gyrA_SET[87:D-G]	S	S	S	S	S	S	S	S	S	1	No	FII-S1;FIB-22	-	gyrA_SET[87:D-G]	-	-	-	-	-	-	-	-	-	-	-	-	-
14	2011-01-12	2011	Blood	3	no	na	ERR998502	11	4	North American lineage	1.5.11.13.2866.3624.6977	0.015	S	na	R	S	S	S	S	S	S	S	R	0	No	FIB-22;FII-S1	-	-	-	-	-	-	-	-	-	-	-	-	-	-	-
15	2011-04-18	2011	Blood	1	yes	na	ERR1010101	11	4	Global epidemic	1.1.53.76.2863.3621.6974	0.12	DCS	gyrA_SET[87:D-N]	S	S	R	S	S	R	S	S	R	1	No	FII-S1;FIB-22	-	gyrA_SET[87:D-N]	-	-	-	-	-	-	-	-	-	-	-	-	-
16	2011-05-04	2011	Blood	1	no	na	ERR984873	11	4	West african	9.110.536.2055.2869.3627.6980	0.12	DCS	Efflux pump	R	S	R	S	S	S	S	S	R	0	No	FII-S1;FIB-22;I1	-	-	-	-	-	-	-	-	-	-	-	-	-	-	-
17	2011-06-30	2011	Blood	3	no	na	ERR984803	11	4	Global epidemic	1.1.173.302.302.3631.6984	0.12	DCS	gyrA_SET[87:D-G]	S	S	S	S	S	S	S	R	R	6	Yes	FII-S1;FIB-22	-	gyrA_SET[87:D-G]	-	tet(A)	aph(6)-Id,strA,strB	-	sul-2	-	-	-	-	-	-	-	-
18	2011-07-12	2011	Blood	0	yes	na	ERR984822	11	4	West african	9.16.68.108.2872.3630.6983	0.015	S	na	R	R	R	S	R	S	R	R	R	9	Yes	I1	catA-1	-	-	tet(A)	aph(6)-Id,strA,strB;	-	sul-2;sul-1	TEM-1	-	-	-	dfrA-7	-	-	-
19	2011-08-15	2011	Blood	1	no	na	ERR1010036	11	4	Global epidemic	1.1.2.2052.2865.3623.6976	0.12	DCS	gyrA_SET[87:D-Y]	S	S	R	S	S	R	S	S	R	1	No	FII-S1;FIB-22	-	gyrA_SET[87:D-Y]	-	-	-	-	-	-	-	-	-	-	-	-	-
20	2011-09-25	2011	Blood	2	no	na	ERR1010028	11	4	Global epidemic	1.1.173.302.302.3634.6987	0.12	DCS	gyrA_SET[87:D-G]	S	S	R	S	S	S	S	S	R	1	No	FII-S1;FIB-22	-	gyrA_SET[87:D-G]	-	-	-	-	-	-	-	-	-	-	-	-	-
21	2012-05-03	2012	Blood	2	no	na	ERR1010152	11	4	Global epidemic	1.1.173.302.2861.3619.6972	0.25	DCS	gyrA_SET[87:D-G]	S	S	S	S	S	S	S	S	S	1	No	FII-S1;FIB-22	-	gyrA_SET[87:D-G]	-	-	-	-	-	-	-	-	-	-	-	-	-
22	2013-11-22	2013	Blood	1	missing data	na	SRR7293298	11	4	North American lineage	1.5.11.13.3210.4165.8548	0.016	S	na	1 sensitive		3 resistant		1 sensitive	1 sensitive			3 resistant	0	No	FII-S1;FIB-22	-	-	-	-	-	-	-	-	-	-	-	-	-	-	-
23	2014-01-08	2014	Blood	2	yes	na	SRR7072858	11	4	Global epidemic	1.1.173.302.366.4166.8566	0.12	DCS	gyrA_SET[87:D-G]	1 sensitive		3 resistant		1 sensitive	1 sensitive			3 resistant	4	Yes	FII-S1;FIB-22	-	gyrA_SET[87:D-G]	-	tet(A)	strA	-	sul-2	-	-	-	-	-	-	-	-
24	2014-01-09	2014	Blood	3	no	na	SRR7293291	11	4	North American lineage	1.5.11.13.3208.4163.8545	0.012	S	na	1 sensitive		3 resistant		1 sensitive	1 sensitive			3 resistant	0	No	FII-S1;FIB-22	-	-	-	-	-	-	-	-	-	-	-	-	-	-	-
25	2014-05-29	2014	Blood	13	no	na	SRR7293290	1479	4	Central/ East African	21.58.294.1235.3212.4168.8570	0.012	S	na	1 sensitive		3 resistant		1 sensitive	1 sensitive			3 resistant	0	No	-	-	-	-	-	-	-	-	-	-	-	-	-	-	-	-
26	2014-11-25	2014	Blood	2	no	na	SRR7293288	11	4	North American lineage	1.5.11.13.3211.4167.8569	0.016	S	na	1 sensitive		3 resistant		1 sensitive	1 sensitive			3 resistant	0	No	FII-S1;FIB-22	-	-	-	-	-	-	-	-	-	-	-	-	-	-	-
27	2014-12-07	2014	Blood	1	no	na	SRR7293289	11	4	West African	9.16.68.108.3209.4164.8547	0.008	S	na	3 resistant		3 resistant		1 sensitive	1 sensitive			3 resistant	5	Yes	I1	catA-1	-	-	tet(A)	-	-	sul-1	TEM-1	-	-	-	dfrA-7	-	-	-
28	2015-05-11	2015	Poultry meat	na	na	open market, Kumasi, fresh slaughtered, local breed	SRR7072859	11	4	Global epidemic	1.1.173.302.3213.4169.8572	0.25	DCS	gyrA_SET[87:D-G]	S				I	R	S		S	4	Yes	FII-S1;FIB-22	-	gyrA_SET[87:D-G]	-	tet(A)	strA	-	sul-2	-	-	-	-	-	-	-	-
29	2015-10-13	2015	Poultry meat	na	na	supermarket, frozen meat, imported from USA	SRR7293287	1973	0 – SLV in EBG4	North American lineage	1.5.11.13.3282.4309.8994	0.06	S	na	S				S	S	S		S	0	No	FII-S1;FIB-22	-	-	-	-	-	-	-	-	-	-	-	-	-	-	-
Abbreviations and footnotes:
na	not applicable
DCS	Diminished ciprofloxacin susceptibility
* SNP address methodology described in Reference 31 of manuscript: Ashton P, Nair S, Peters T, Tewolde R, Day M, Doumith M, et al. Revolutionising Public Health Reference Microbiology using Whole Genome Sequencing: Salmonella as an exemplar. bioRxiv. : 033225.
** S = Sensitive, DCS = Diminished ciprofloxacin susceptibility
*** MDR defined in this study as resistance to ≥ 3 antimicrobial classes
